# Supplementary material for: Enhanced adsorption and synergistic photocatalytic degradation of tetracycline by MOF-801/GO composites via solvothermal synthesis
Source: Royal Society of Chemistry journal article supplement (doi:10.1039/d2en00809b), 2022-01-01
Supplement: d2en00809b1.pdf [file d2en00809b1.pdf]

Electronic Supplementary Material (ESI) for

## **Enhanced adsorption and synergistic photocatalytic degradation of tetracycline by MOF-801/GO composite via solvothermal synthesis**

Zhihai Wu<sup>a,b,#</sup>, Ziyang Chen<sup>b,#</sup>, Jia Chen<sup>b,\*</sup>, Xiaofeng Ning<sup>c</sup>, Pinghua Chen<sup>a,\*</sup>, Hualin Jiang<sup>a</sup>, Hongdeng Qiu<sup>b,d,\*</sup>

<sup>a</sup> Key Laboratory of Jiangxi Province for Persistent Pollutants Control and Resources Recycle, Nanchang Hangkong University, Nanchang 330063, China

<sup>b</sup> CAS Key Laboratory of Chemistry of Northwestern Plant Resources and Key Laboratory for Natural Medicine of Gansu Province, Lanzhou Institute of Chemical Physics, Chinese Academy of Sciences, Lanzhou 730000, China

<sup>c</sup> State Key Laboratory for Oxo Synthesis and Selective Oxidation, Lanzhou Institute of Chemical Physics, Chinese Academy of Sciences, Lanzhou 730000, China

<sup>d</sup> College of Chemistry and Chemical Engineering, Gannan Normal University, Ganzhou 341000, China

<sup>#</sup> Z. Wu and Z. Chen contributed equally to this work.

<sup>\*</sup> Corresponding E-mail: jiachen@licp.cas.cn (J. Chen); cph1979@126.com (P. Chen); hdqiu@licp.cas.cn (H. Qiu).

## EXPERIMENTAL SECTION

**Synthesis of GO.** GO was prepared according to the modified Hummers method.<sup>1</sup> In short, 5 g  $\text{NaNO}_3$  and 5 g 200 mesh natural phosphorus flake graphite powder were successively added into a three-necked flask, then slowly poured into 200 mL of concentrated  $\text{H}_2\text{SO}_4$ , and after stirring in an ice-water bath for 1 h. A total of 20 g of potassium permanganate was slowly added in batches, and the temperature during this process was kept below 10 °C. Then, it was stirred continuously for 26 h in a 38 °C water bath, 200 mL of deionized water was slowly added, and finally the temperature was raised to 84 °C for 15 min. The reaction was stopped and cooled to room temperature. Slowly add  $\text{H}_2\text{O}_2$  (30 %) until there is no foam in the solution; Finally, the resulted solution was washed with 1mol/L HCl and ultrapure water until it was close to neutral. After dialysis for 1 week, the solution was removed for use.

## RESULTS AND DISCUSSION

Subsequently, we performed Raman spectroscopy analysis on GO, MOF-801 and MOF-801/GO composites, as shown in Fig. S1†, where the characteristic signal peak of GO near 1600  $\text{cm}^{-1}$  represents the intrinsic Raman signal peak of G-band graphite, located at the peak near 1350  $\text{cm}^{-1}$  in the D band is induced by the disordered structure caused by the breathing vibration of  $\text{sp}^3$  carbon atoms on the aromatic ring, and the signal peak near 2943  $\text{cm}^{-1}$  is caused by the disordered lattice of the material. The MOF-801/GO composite has narrower peak shapes in the D and G bands than single GO, which indicates that the disorder of the overall composite is slightly reduced after GO is compounded with MOF-801, which is consistent with MOF-801. The results of partial aggregation of 801/GO were consistent.

To confirm the thermal stability of the materials, we performed thermogravimetric analysis of GO, MOF-801, and MOF-801/GO, whose TGA curves are shown in Fig. S2† With the increase of temperature, MOF-801 showed three obvious weight loss peaks. The first weight loss stage is mainly around 25~100 °C, we believe that the weight loss peak at this stage is caused by the release of water molecules from the outer cage of MOF-801/GO; the second weight loss stage is around 160~280 °C, we speculate This is due to the evaporation of some water molecules remaining in the internal pores of MOF-801; while the weight loss peak at 280~400 °C is due to the mass loss caused by the decomposition of the MOF material. Therefore, the thermal stability was enhanced when GO was incorporated into MOF-801.

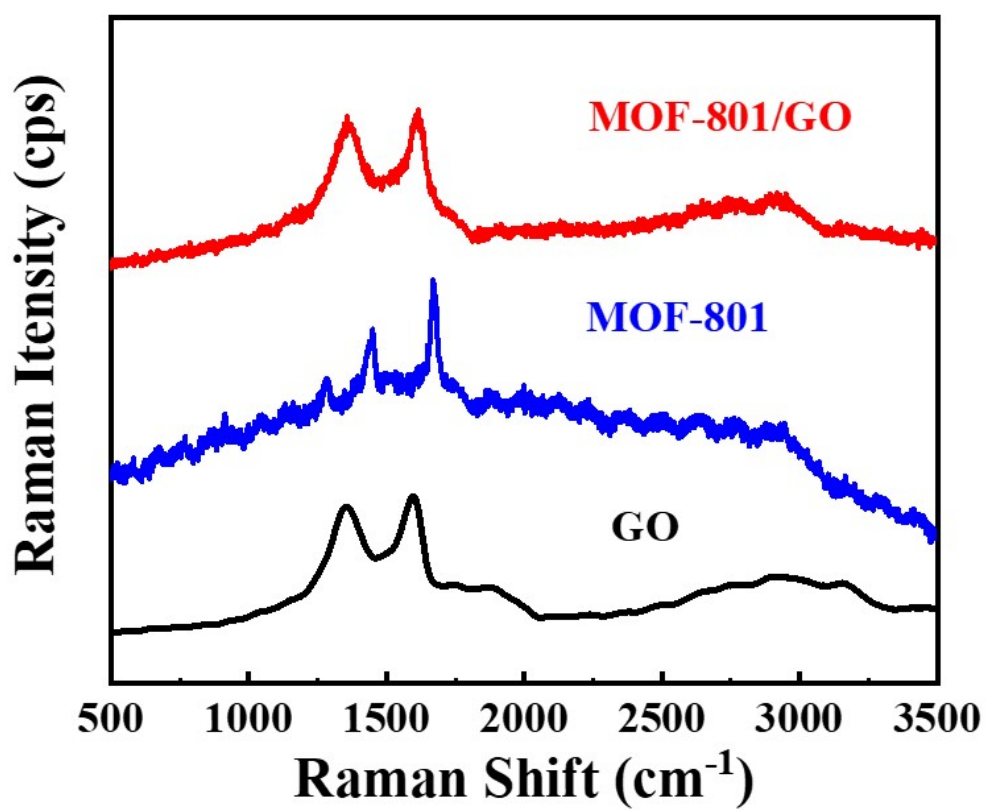

Fig. S1 Raman spectrum of GO, MOF-801 and MOF-801/GO.

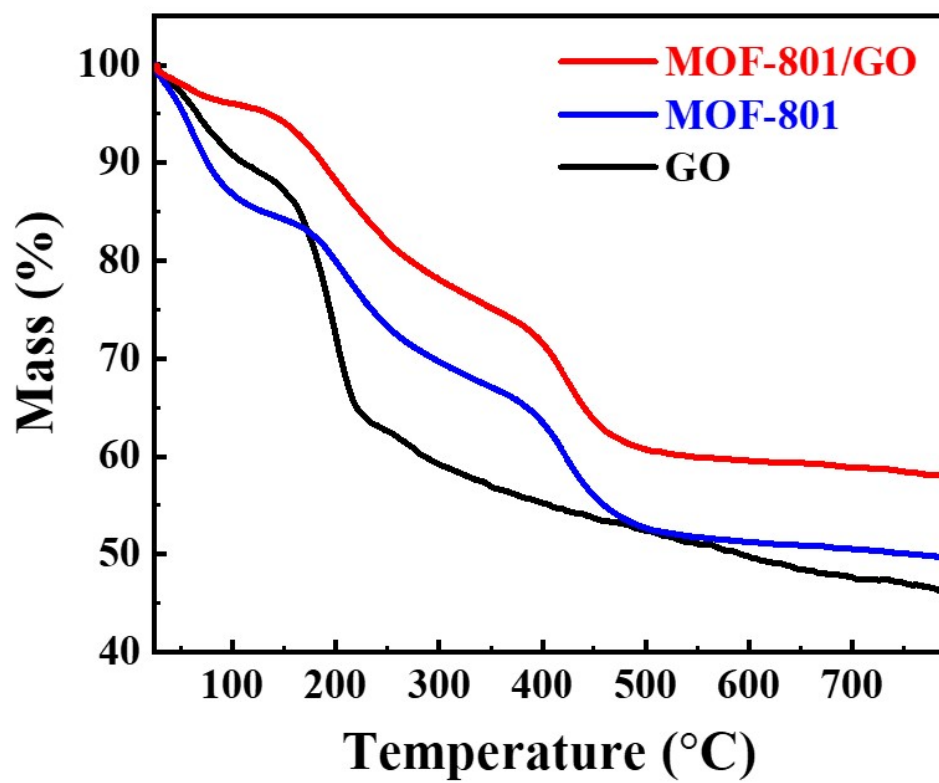

Fig. S2 Thermogravimetric spectrum of GO, MOF-801 and MOF-801/GO.

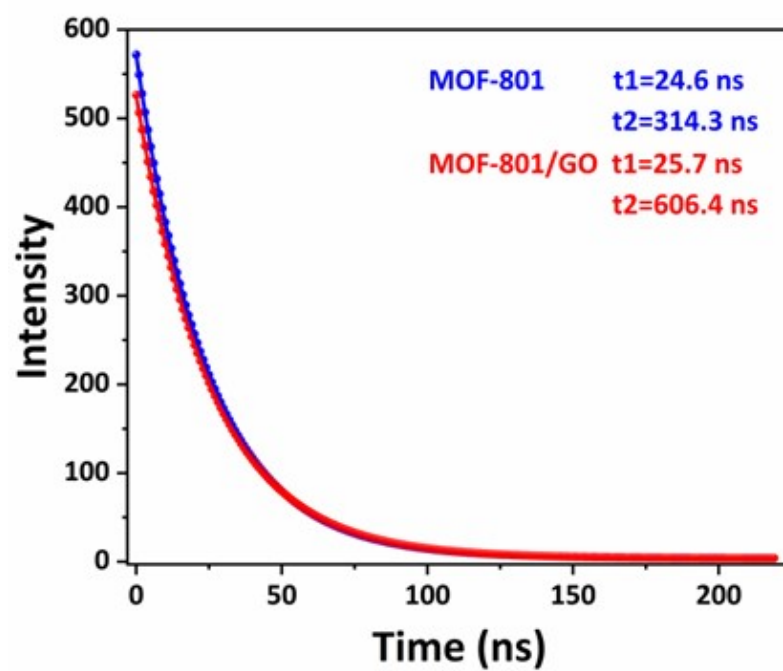

**Fig. S3** Fluorescence lifetime diagram of MOF-801 and MOF-801/GO.

**Table S1** Comparison of TC removal efficiency between this work and various photocatalysts.

| Photocatalysts                                        | Catalyst<br>concentration<br>(g L <sup>-1</sup> ) | TC<br>concentration<br>(mg L <sup>-1</sup> ) | Removal<br>efficiency<br>(react time) | Reference |
|-------------------------------------------------------|---------------------------------------------------|----------------------------------------------|---------------------------------------|-----------|
| g-C <sub>3</sub> N <sub>4</sub> /Fe <sub>2</sub> N    | 1                                                 | 20                                           | 95.7 %<br>(30 min)                    | 2         |
| g-C <sub>3</sub> N <sub>4</sub> /MnO <sub>2</sub> /GO | 0.5                                               | 10                                           | 91.4 %<br>(60 min)                    | 3         |
| Nb-RGO-0.5                                            | 0.4                                               | 30                                           | 74.69 %<br>(9 min)                    | 4         |
| MoS <sub>2</sub> @Z-5                                 | 0.2                                               | 20                                           | 87.23 %<br>(210 min)                  | 5         |
| CdS/Bi                                                | 0.1                                               | 20                                           | 90 %<br>(60 min)                      | 6         |
| RGO@BT                                                | 0.2                                               | 40                                           | 94.7 %<br>(120 min)                   | 7         |
| rGO/Ag <sub>2</sub> CO <sub>3</sub>                   | 0.3                                               | 10                                           | 91.64 %<br>(60 min)                   | 8         |
| Fe <sub>3</sub> O <sub>4</sub> @GO-CoPc               | 0.4                                               | 40                                           | 99 %<br>(120 min)                     | 9         |
| BiOI/MIL-121                                          | 1                                                 | 20                                           | 68 %<br>(120 min)                     | 10        |
| Cu-TiO <sub>2</sub> /GO                               | 1                                                 | 20                                           | 98 %<br>(90 min)                      | 11        |
| CdS/rGO/ZFO                                           | 0.2                                               | 50                                           | 80 %<br>(60 min)                      | 12        |
| GO/Bi <sub>2</sub> WO <sub>6</sub>                    | 0.4                                               | 20                                           | 84 % (60 min)                         | 13        |
| g-C <sub>3</sub> N <sub>4</sub> /GO/BiOBr             | 0.5                                               | 10                                           | 96 %<br>(120 min)                     | 14        |
| CdS-TNs/rGO                                           | 0.75                                              | 30                                           | 84 %<br>(180 min)                     | 15        |
| MOF-801/GO                                            | 0.6                                               | 20                                           | 97 %<br>(60 min)                      | This work |

## REFERENCES

1. W. S. Hummers, R. E. Offeman, Preparation of Graphitic Oxide, *J. Am. Chem. Soc.* 1958, **80**, 1339-1339.
2. J. Yang, Y. Liang, G. Yang, K. Wang, Z. Zeng, Z. Xiong and Y. Han, Constructing electrostatic self-assembled ultrathin porous red 2D g-C<sub>3</sub>N<sub>4</sub>/Fe<sub>2</sub>N Schottky catalyst for high-efficiency tetracycline removal in photo-Fenton-like processes, *J. Colloid Interf. Sci.* 2022, **607**, 1527-1539.
3. C. Du, Z. Zhang, S. Tan, G. Yu, H. Chen, L. Zhou, L. Yu, Y. Su, Y. Zhang, F. Deng and S. Wang, Construction of Z-scheme g-C<sub>3</sub>N<sub>4</sub>/MnO<sub>2</sub>/GO ternary photocatalyst with enhanced photodegradation ability of tetracycline hydrochloride under visible light radiation, *Environ. Res.* 2021, **200**, 111427.
4. S. Heng, Q. Song, S. Liu, H. Guo, J. Pang, X. Qu, Y. Bai, L. Li and D. Dang, Construction of 2D polyoxoniobate/RGO heterojunction photocatalysts for the enhanced photodegradation of tetracycline, *Appl. Surf. Sci.* 2021, **553**, 149505.
5. J. Liu, H. Lin, Y. Dong, Y. He and C. Liu, MoS<sub>2</sub> nanosheets loaded on collapsed structure zeolite as a hydrophilic and efficient photocatalyst for tetracycline degradation and synergistic mechanism, *Chemosphere*, 2022, **287**, 132211.
6. R. K. Chava, N. Son and M. Kang, Bismuth quantum dots anchored one-dimensional CdS as plasmonic photocatalyst for pharmaceutical tetracycline hydrochloride pollutant degradation, *Chemosphere*, 2022, **300**, 134570.
7. D. Zhu, L. Cai, Z. Sun, A. Zhang, P. Heroux, H. Kim, W. Yu and Y. Liu, Efficient degradation of tetracycline by RGO@black titanium dioxide nanofluid via enhanced catalysis and photothermal conversion, *Sci. Total Environ.* 2021, **787**, 147536.
8. A. Rehemani, K. Kadeer, K. Okitsu, M. Halidan, Y. Tursun, T. Dilinuer and A. Abulikemu, Facile photo-ultrasonic assisted reduction for preparation of rGO/Ag<sub>2</sub>CO<sub>3</sub> nanocomposites with enhanced photocatalytic oxidation activity for tetracycline, *Ultrason. Sonochem.* 2019, **51**, 166-177.
9. X. Huang, J. Xiao, Q. Yi, D. Li, C. Liu and Y. Liu, Construction of core-shell Fe<sub>3</sub>O<sub>4</sub>@GO-CoPc photo-Fenton catalyst for superior removal of tetracycline: The role of GO in promotion of H<sub>2</sub>O<sub>2</sub> to •OH conversion, *J. Environ. Manage.* 2022, **308**, 114613.
10. D. Dai, J. Qiu, M. Li, J. Xu, L. Zhang and J. Yao, Construction of two-dimensional BiOI on carboxyl-rich MIL-121 for visible-light photocatalytic degradation of tetracycline, *J. Alloy. Compd.*

2021, **872**.

11. S. Qian, S. Pu, Y. Zhang, P. Wang, Y. Bai and B. Lai, New insights on the enhanced non-hydroxyl radical contribution under copper promoted  $\text{TiO}_2/\text{GO}$  for the photodegradation of tetracycline hydrochloride, *J. Environ. Sci.* 2021, **100**, 99-109.
12. W. Shi, L. Wang, J. Wang, H. Sun, Y. Shi, F. Guo and C. Lu, Magnetically retrievable  $\text{CdS}/\text{reduced graphene oxide}/\text{ZnFe}_2\text{O}_4$  ternary nanocomposite for self-generated  $\text{H}_2\text{O}_2$  towards photo-Fenton removal of tetracycline under visible light irradiation, *Sep. Purif. Technol.* 2022, **292**, 120987.
13. Z. Guan, X. Li, Y. Wu, Z. Chen, X. Huang, D. Wang, Q. Yang, J. Liu, S. Tian, X. Chen and H. Zhao, AgBr nanoparticles decorated 2D/2D  $\text{GO}/\text{Bi}_2\text{WO}_6$  photocatalyst with enhanced photocatalytic performance for the removal of tetracycline hydrochloride, *Chem. Eng. J.* 2021, **410**, 128283.
14. L. Jiang, Y. Xie, F. He, Y. Ling, J. Zhao, H. Ye, S. Li, J. Wang and Y. Hou, Facile synthesis of GO as middle carrier modified flower-like  $\text{BiOBr}$  and  $\text{C}_3\text{N}_4$  nanosheets for simultaneous treatment of chromium(VI) and tetracycline, *Chinese Chem. Lett.* 2021, **32**, 2187-2191.
15. F. Firouzi, A. Ebrahimian Pirbazari, F. Simultaneous adsorption-photocatalytic degradation of tetracycline by  $\text{CdS}/\text{TiO}_2$  nanosheets/graphene nanocomposites: Experimental study and modeling, *J. Environ. Chem. Eng.* 2021, **9**, 106795.
